## Methotrexate as a preferential cyclooxygenase 2 inhibitor in whole blood of patients with rheumatoid arthritis

S. B. V. Mello, D. M. Barros<sup>1</sup>, A. S. F. Silva<sup>1</sup>, I. M. M. Laurindo<sup>2</sup> and G. S. Novaes<sup>3</sup>

Rheumatology Division, Department of Internal Medicine, School of Medicine, University of Sao Paulo, <sup>1</sup>School of Medicine, University of Sao Paulo, <sup>2</sup>Rheumatology Division, Department of Internal Medicine, Clinical Hospital, School of Medicine, University of Sao Paulo and <sup>3</sup>Rheumatology Division, Department of Medicine, School of Medicine, Catholic University of São Paulo, Brazil

### Abstract

**Objective.** To investigate the regulation of whole-blood cyclooxygenase-1 and -2 (COX-2 and COX-1) activities by methotrexate (MTX) in rheumatoid arthritis (RA) patients.

**Methods.** Whole blood was withdrawn from nine healthy volunteers, 12 RA patients treated with MTX (RA/MTX) and six RA patients treated with chloroquine (RA/CQ). COX-1 activity was quantified as platelet thromboxane B<sub>2</sub> production in unstimulated blood and COX-2 activity was measured as prostaglandin E<sub>2</sub> (PGE<sub>2</sub>) production in whole blood stimulated with LPS. Thromboxane B<sub>2</sub> and PGE<sub>2</sub> were measured by radioimmunoassay. We studied the drug effect *in vitro* by direct incubation of MTX with blood obtained from normal donors. *Ex vivo* assays were performed with blood collected from RA/MTX and RA/CQ patients. The influence of serum factors on enzyme activities was analysed in blood collected from normal donors and incubated with RA/MTX, autologous or heterologous serum.

**Results.** *In vitro* assays showed no direct action of MTX on the activity of either enzyme. Assays performed with blood from RA/MTX patients showed preferential inhibition of COX-2 activity (PGE<sub>2</sub> = 10.11 ± 2.42 ng/ml) when compared with blood of normal donors (PGE<sub>2</sub> = 37.7 ± 4.36 ng/ml; *P* = 0.001). Inhibition of COX-2 activity was also observed when blood of normal donors was co-incubated with RA/MTX serum.

**Conclusion.** Our results clearly show that the anti-inflammatory action of low-dose MTX is partly mediated by a serum factor induced by MTX or a MTX metabolite that preferentially inhibits the activity of COX-2.

**KEY WORDS:** Methotrexate, Anti-inflammatory agents, Cyclooxygenases, Rheumatoid arthritis.

Rheumatoid arthritis (RA) is an autoimmune disease in which inflammation of the cells lining the synovium produces pain, swelling and progressive erosion of the synovial joints. Cyclooxygenase (COX) is an enzyme that catalyses the conversion of arachidonic acid to prostaglandin H<sub>2</sub>, which is further converted to other prostaglandins, prostacyclin and thromboxanes [1, 2]. There are two COX isozymes, called COX-1 and COX-2, encoded by separate genes. COX-1 is a constitutive enzyme and mediates functions such as the regulation

of kidney functions, stomach acid secretion, and inhibition of platelet aggregation [2]. The COX-2 isozyme mediates pain [3] and is induced mainly during the inflammatory process by monocytes stimulated by cytokines and mitogens [2, 4].

Recent results from animal models and clinical studies suggest that COX-2 is up-regulated in inflammatory joint disease and is a potential therapeutic target in arthritis [5]. Rabbits with antigen-induced arthritis exhibit an increased prostaglandin E<sub>2</sub> (PGE<sub>2</sub>) level in synovial fluid, which is reduced by previous administration of dexamethasone [6]. Immunocytochemical studies of synovial membrane from patients with RA and rats with adjuvant arthritis, using a COX-2-specific antibody, showed positive staining in RA patients, but not in synovial membrane from normal subjects [5].

Submitted 21 May 1999; revised version accepted 10 January 2000.

Correspondence to: S. B. V. Mello, Rheumatology Division, Department of Internal Medicine, School of Medicine, University of São Paulo, Av. Dr Arnaldo 455, Sala 3118, Sao Paulo, SP, Brazil CEP 01246-903.

Additionally, synovial cells from RA patients produced large amounts of PGE<sub>2</sub> and also showed increased gene expression of COX-2, but not of COX-1 [7].

Very limited information is available about the effects of disease-modifying anti-rheumatic drugs (DMARDs) on the activity of COX enzymes. It remains unclear how low-dose methotrexate (MTX) acts as an anti-inflammatory agent. Recent results obtained in our laboratory showed that, like dexamethasone, MTX decreases PGE<sub>2</sub> and interleukin-1 levels in synovial fluid collected from rabbits with arthritic knees [6]. This study was designed to test, *in vitro* and *ex vivo*, the effectiveness of MTX as an inhibitor of COX-1 and COX-2 activities in the whole blood of rheumatoid arthritis patients.

## Patients and methods

### *Patient selection for the ex vivo assay*

Peripheral whole blood for measurement of COX-2 and -1 activity was collected from 15 patients with RA (12 women and three men, aged  $57.13 \pm 3.28$  yr). All patients met the American College of Rheumatology 1987 revised criteria [8]. Written informed consent was obtained from them before they entered the study. The mean duration of the disease was  $11.14 \pm 2.65$  yr. Clinical evaluation was performed at each visit. Pain, duration of early morning stiffness, number of swollen and/or tender joints, and Westergren sedimentation rate were quantified and combined in an activity score as described by Wilke *et al.* [9] (0 = no activity, 8 = maximal activity). No patient had received concomitant therapy with non-steroidal anti-inflammatory drugs (NSAIDs) or glucocorticosteroids within 2 weeks before the study. Twelve patients had a regimen of 5–7.5 mg MTX taken as a single weekly oral dose (RA/MTX patients). Three patients were without medication at study entry. Nine healthy volunteers who were sex- and age-matched served as normal controls. All refrained from taking NSAIDs for at least 2 weeks before donating blood. Additionally, six RA patients treated with 250 mg chloroquine daily (RA/CQ patients) were studied; they were similar to the patients treated with MTX with respect to age ( $53 \pm 4.01$  yr) and disease duration ( $8.3 \pm 2.15$  yr). All steps for the measurement of whole-blood COX-2 and COX-1 activities in the patients and control were performed as described below under the heading *In vitro* assays.

### *In vitro assays*

**Measurement of COX-1 activity in human whole blood.** Methotrexate (Lederle-Cyanamid, Wolfrats-house, Germany) was previously diluted in phosphate-buffered saline (PBS) and 2  $\mu$ l of each solution was added to the vials. The final concentrations of MTX in the assay were  $10^{-4}$ ,  $10^{-5}$ ,  $10^{-6}$ ,  $10^{-7}$  and  $10^{-8}$  M, and a control tube was incubated with 2  $\mu$ l PBS. Normal human venous blood was collected with no anticoagulant, and 500  $\mu$ l was immediately added to each tube containing 2  $\mu$ l test substance. The tubes were vortexed and placed

in an incubator at 37°C for 60 min. Serum was separated by centrifugation (10 min at 3000 r.p.m.) and 100  $\mu$ l was removed and added to a tube containing 400  $\mu$ l methanol. After another centrifugation, supernatant was kept at  $-70^{\circ}\text{C}$  until assayed for thromboxane B<sub>2</sub> [10].

**Measurement of COX-2 activity in human whole blood.** Human fresh venous blood was collected with no anticoagulant and 500  $\mu$ l was immediately added to each tube containing 2  $\mu$ l test substance, heparin (10 IU/ml), lipopolysaccharide from *Escherichia coli* (LPS; 100  $\mu\text{g/ml}$ ). To assess the basal activity of the enzyme, a control tube was incubated in the absence of LPS. The tubes were vortexed and placed in an incubator at 37°C for 24 h. Plasma was separated and PGE<sub>2</sub> extracted and quantified by the same procedure as that described for thromboxane B<sub>2</sub> (TxB<sub>2</sub>) [10].

**Influence of serum collected from RA/MTX patients on whole-blood COX-2 and COX-1 activities.** In order to assess the effects of serum factors on COX-2 and COX-1 activities, 250  $\mu$ l blood from each of six healthy subjects was co-incubated with 250  $\mu$ l serum collected from six RA/MTX patients as well as with autologous or heterologous serum. The assays for COX-1 and COX-2 activities were performed as described above and the results corrected for the dilutions performed.

**Analyses of TxB<sub>2</sub> and PGE<sub>2</sub>.** Concentrations of PGE<sub>2</sub> and TxB<sub>2</sub> were measured by radioimmunoassay using commercial kits (DuPont/New England Nuclear NEN<sup>®</sup>, Boston, MA, USA) [10].

### *Statistical analysis*

Results are expressed as mean  $\pm$  s.e.m. A probability level of  $<0.05$ , as assessed by analysis of variance followed by the Newman–Keuls test, was considered significant.

## Results

### *In vitro effect of MTX on COX-2 and COX-1 activities*

The *in vitro* effects of MTX on COX-1 and COX-2 activities were quantified by measurement of PGE<sub>2</sub> and TxB<sub>2</sub> in the serum of six normal, healthy donors exposed to different drug concentrations. The results of *in vitro* assays showed no direct action of any dose of MTX on the activity of either enzyme (COX-1:  $290.21 \pm 12.86$  ng/ml TxB<sub>2</sub> for MTX,  $284.46 \pm 46.76$  for controls; COX-2:  $32.03 \pm 1.81$  ng/ml PGE<sub>2</sub> for MTX,  $30.46 \pm 2.69$  for controls).

### *Ex vivo evaluation of whole-blood COX-2 and COX-1 activities in RA/MTX patients*

The results of the analysis of whole-blood COX-2 and COX-1 activities in 12 RA/MTX patients, six RA/CQ patients and nine matched normal controls are presented in Fig. 1. Our results clearly show that the use of MTX by RA patients promoted preferential inhibition of COX-2 activity. RA patients treated with CQ showed PGE<sub>2</sub> values within the normal range, similar to those obtained with whole blood collected from normal donors and significantly different from those obtained in

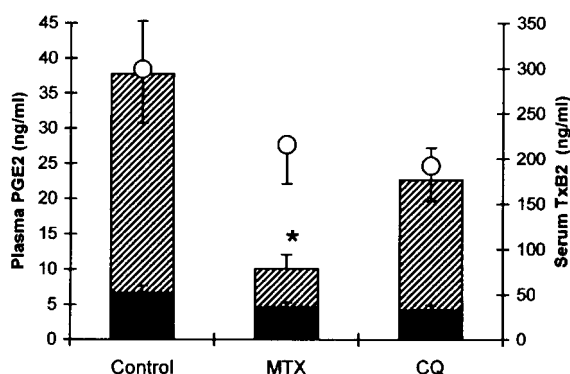

FIG. 1. Prostaglandin E<sub>2</sub> production in heparinized whole blood stimulated with LPS for 24 h as a reflection of COX-2 activity of monocytes (▨) and basal activity of COX-2 in unstimulated monocytes (■). Thromboxane B<sub>2</sub> (TxB<sub>2</sub>) production in whole blood incubated for 1 h as an indicator of COX-1 activity (○). The *ex vivo* assay was performed with blood collected from 12 RA/MTX patients (MTX), six RA/CQ patients (CQ) and nine normal healthy donors (Control). Values are mean  $\pm$  S.E.M. \* $P < 0.05$ .

RA/MTX patients. The basal plasma concentrations of PGE<sub>2</sub> (without LPS) was not affected by any treatment ( $4.65 \pm 0.9$  ng/ml PGE<sub>2</sub> for RA/MTX patients,  $4.23 \pm 0.56$  ng/ml for RA/CQ patients and  $6.7 \pm 1.03$  ng/ml for normal donors). Inhibition of whole-blood COX-1 activity was not found in RA/MTX patients or in patients treated with CQ. No correlation was found between the Wilke activity score ( $3.33 \pm 0.61$ ) and COX-2/COX-1 activities. It should be emphasized that the numbers of circulating monocytes and platelets in all groups of patients were within the normal range, and did not correlate with the level of COX-1 or COX-2 activity (data not shown).

#### Influence of serum factors on COX-1 and COX-2 activities

In order to investigate the influence of serum factors on enzyme activity, whole blood was collected from normal donors and exposed to RA/MTX, autologous or heterologous serum during the stimulation of COX-1 and COX-2 activity. Results in Table 1 indicate that specific inhibition of COX-2 activity was obtained only when blood from normal donors was co-incubated with

TABLE 1. Effect of serum on whole-blood COX-2 and COX-1 activities

|                                                             | RA/MTX serum       | Autologous serum  | Heterologous serum |
|-------------------------------------------------------------|--------------------|-------------------|--------------------|
| Whole-blood PGE <sub>2</sub> production stimulated with LPS |                    |                   |                    |
| COX-2 activity                                              |                    |                   |                    |
| 6                                                           | $29.75 \pm 2.28^*$ | $42.5 \pm 4.66$   | $40.25 \pm 3.6$    |
| Whole-blood thromboxane B <sub>2</sub> production           |                    |                   |                    |
| COX-1 activity                                              |                    |                   |                    |
| 6                                                           | $184.6 \pm 23.3$   | $233.75 \pm 17.5$ | $176.25 \pm 17.4$  |

Blood from six normal donors was co-incubated with RA/MTX serum, autologous serum or heterologous serum. Data are expressed as mean  $\pm$  S.E.M.

\* $P < 0.05$  compared with autologous and heterologous values.

RA/MTX serum. The co-incubation with autologous or heterologous serum did not interfere with enzyme activity. No inhibitory influence of RA/MTX serum on COX-1 activity was detected.

## Discussion

The aim of this study was to test the effect of low-dose methotrexate on COX-2 and COX-1 activities using a whole-blood assay [10]. This assay simulated the physiological responses of humans to drug administration, thereby resulting in a more accurate *ex vivo* measurement of the ability of a drug to inhibit COX-2 and COX-1 activities [10, 11, 12, 13]. We tested the *in vitro* action of MTX by incubation of blood collected from normal donors with the drug, and the *ex vivo* effect was studied using blood from RA patients treated only with MTX. Our results showed a reduction of whole-blood COX-2 or CQ activity when the assay was performed with blood collected from RA patients treated with a low dose of methotrexate. RA patients treated with CQ showed PGE<sub>2</sub> production within the normal range, similar to the result obtained with whole blood from normal donors. It is worth noticing that the concentration of PGE<sub>2</sub> in the whole blood of three RA patients without medication was similar to that in blood from normal donors (33.52 ng/ml). Furthermore, we found no correlation between prostaglandin levels and the Wilke activity score. COX-1 activity was not altered by MTX or CQ therapy.

The results of the *in vitro* assay performed with different concentrations of MTX showed no direct action of the drug on whole-blood COX-2 or COX-1 activities. This result probably rules out a direct action of the drug on either enzyme.

In order to investigate the influence of serum factors on enzyme activity, whole blood collected from normal donors was exposed to RA/MTX, autologous or heterologous serum during assays for COX-1 and COX-2 activities. The results showed a preferential ability of serum from RA/MTX patients to inhibit COX-2 activity. This inhibition of COX-2 activity, verified only in the presence of RA/MTX serum, supports a direct effect on the enzyme, possibly mediated by some inhibitory mediator induced by this drug or an MTX metabolite. Cronstein *et al.* [14] and Morabito *et al.* [15] have linked MTX to the inhibition of amino imidazole carboxamidonucleotide transformylase and the subsequent accumulation of adenosine, a potent inhibitor of neutrophil function. Results obtained previously in our laboratory showed an effect of a metabolite of MTX on neutrophil superoxide production [16].

Thus, MTX induces the presence of an inhibitory factor or an MTX metabolite, which inhibits COX-2 activity without affecting COX-1 activity, as suggested by the following observations. First, whole blood from RA/MTX patients showed a reduction in the concentration of PGE<sub>2</sub> after LPS stimulation. Secondly, co-incubation of serum from these RA/MTX patients with blood from healthy donors promoted preferential

inhibition of COX-2 activity without affecting the concentration of TxB<sub>2</sub> (COX-1 activity). In order to confirm this hypothesis we performed the *ex vivo* COX-1 and COX-2 activity assays using blood collected from a non-RA patient treated only with MTX (5 mg/week) for psoriasis. The results showed an inhibitory action of MTX specifically on whole-blood COX-2 activity. In this patient, the production of PGE<sub>2</sub> was reduced by the same magnitude as that observed in RA/MTX patients (8 ng/ml), and the production of TxB<sub>2</sub> was within the normal range (232.5 ng/ml). The *ex vivo* down-regulation of whole-blood COX-2 activity by MTX could explain its early-onset anti-inflammatory action during the treatment of RA patients.

Our results clearly show that part of the anti-inflammatory action of low doses of MTX is mediated by a serum factor induced by MTX or a metabolite of MTX that preferentially inhibits the activity of COX-2 without affecting COX-1 activity.

### Acknowledgements

The authors thank Dr Michel Pairet, who introduced us to this technical procedure, and Maria de Fatima de Almeida and Eliana Maria Marcelino for technical assistance. We express our gratitude to the patients and controls who donated blood for the study. Supported by FAPESP #96/11789-7 and the Brazilian Society of Rheumatology (Fundos Remanescentes).

### References

- De Witt DL. Prostaglandin endoperoxide synthase: regulation of enzyme expression. *Biochim Biophys Acta* 1991;1083:121–34.
- Smith WL, Garavito RM, De Witt DL. Prostaglandin endoperoxide synthases (cyclooxygenases)-1 and -2. *J Biol Chem* 1996;271:33157–60.
- Cashman JN. The mechanism of NSAID in analgesia. *Drugs* 1996;52:13–23.
- Lee SH, Sooyola E, Chanmugan P *et al.* Selective expression of mitogen-inducible cyclooxygenase in macrophages stimulated with lipopolysaccharide. *J Biol Chem* 1992;267:25934–8.
- Kang RY, Freire-Moar J, Sigal E, Chu CQ. Expression of cyclooxygenase-2 in human and an animal model of rheumatoid arthritis. *Br J Rheumatol* 1996;35:711–8.
- Novaes GS, Mello SBV, Laurindo IMM, Cossermelli W. Low dose methotrexate decreases intraarticular prostaglandin and interleukin 1 levels in antigen induced arthritis in rabbits. *J Rheumatol* 1996;23:2092–7.
- Sugiyama E, Taki H, Kuroda A, Mino T, Yamashita N, Kobayashi M. Interleukin 4 inhibits prostaglandin E<sub>2</sub> production by freshly adherent rheumatoid synovial cells via inhibition of biosynthesis and gene expression of cyclooxygenase II but not of cyclooxygenase I. *Ann Rheum Dis* 1996;55:375–82.
- Arnett FC, Edworthy SM, Bloch DA *et al.* The American Rheumatism Association 1987 revised criteria for the classification of rheumatoid arthritis. *Arthritis Rheum* 1988;38:96–104.
- Wilke WS, Sweeney TJ, Calabrese LH. Models of combination therapy with disease-modifying antirheumatic drugs. *Semin Arthritis Rheum* 1993;23(Suppl 1):26–41.
- Patrignani P, Panara MR, Greco A *et al.* Biochemical and pharmacological characterization of the cyclooxygenase activity of human blood prostaglandin endoperoxide synthases. *J Pharmacol Exp Ther* 1994;271:1705–12.
- Brideau C, Kargman S, Liu S, Dallob AL, Ehrich EW, Roger IW *et al.* A human whole blood assay for clinical evaluation of biochemical efficacy of cyclooxygenase inhibitors. *Inflamm Res* 1996;45:68–74.
- Panara MR, Greco A, Santini G *et al.* Effects of the novel anti-inflammatory compounds, N-[2-(cyclohexyloxy)-4-nitrophenyl] methanesulphonamide (NS-398) and 5-methanesulphonamido-6-(2,4-difluorothio-phenyl)-1-indanone (L-745,337), on the cyclooxygenase activity of human blood prostaglandin endoperoxide synthases. *Br J Pharmacol* 1995;116:2429–34.
- Lipsky PE, Abramson SB, Crofford L *et al.* The classification of cyclooxygenase inhibitors. *J Rheumatol* 1998;25:2298–303.
- Cronstein BN, Naime D, Ostad E. The antiinflammatory mechanism of methotrexate: increased adenosine release at inflamed sites diminishes leukocyte accumulation in an *in vivo* model of inflammation. *J Clin Invest* 1993;92:2675–82.
- Morabito L, Montesinos MC, Schreiber DM *et al.* Methotrexate and sulfasalazine promote adenosine release by a mechanism that requires ecto-5-nucleotidase-mediated conversion of adenine nucleotides. *J Clin Invest* 1998;101:295–300.
- Laurindo IMM, Mello SBV, Cossermelli W. Influence of low doses of methotrexate on superoxide anion production by polymorphonuclear leukocytes from rheumatoid arthritis patients. *J Rheumatol* 1995;22:633–8.
